# Supplementary material for: Chromatographic analysis of multicomponent mixture of vitamins B1, B6, B12, benfotiamine and diclofenac; part II: LC-tandem MS/MS method for simultaneous quantification of five components mixture in pharmaceutical formulations and human plasma
Source: Royal Society of Chemistry journal article supplement (doi:10.1039/c6ra03867k), 2016-01-01

Sample Name: "Blank all sol 50/50 mech/h2o" Sample ID: "" File: "Validation 1.wiff"  
Peak Name: "Thiamine" Mass(es): "265.069/122.100 Da"  
Comment: "" Annotation: ""  
Sample Index: 2  
Sample Type: Blank  
Concentration: 0.00 ng/mL  
Calculated Conc: N/A  
Acq. Date: 8/9/2015  
Acq. Time: 5:55:18 PM  
Modified: No

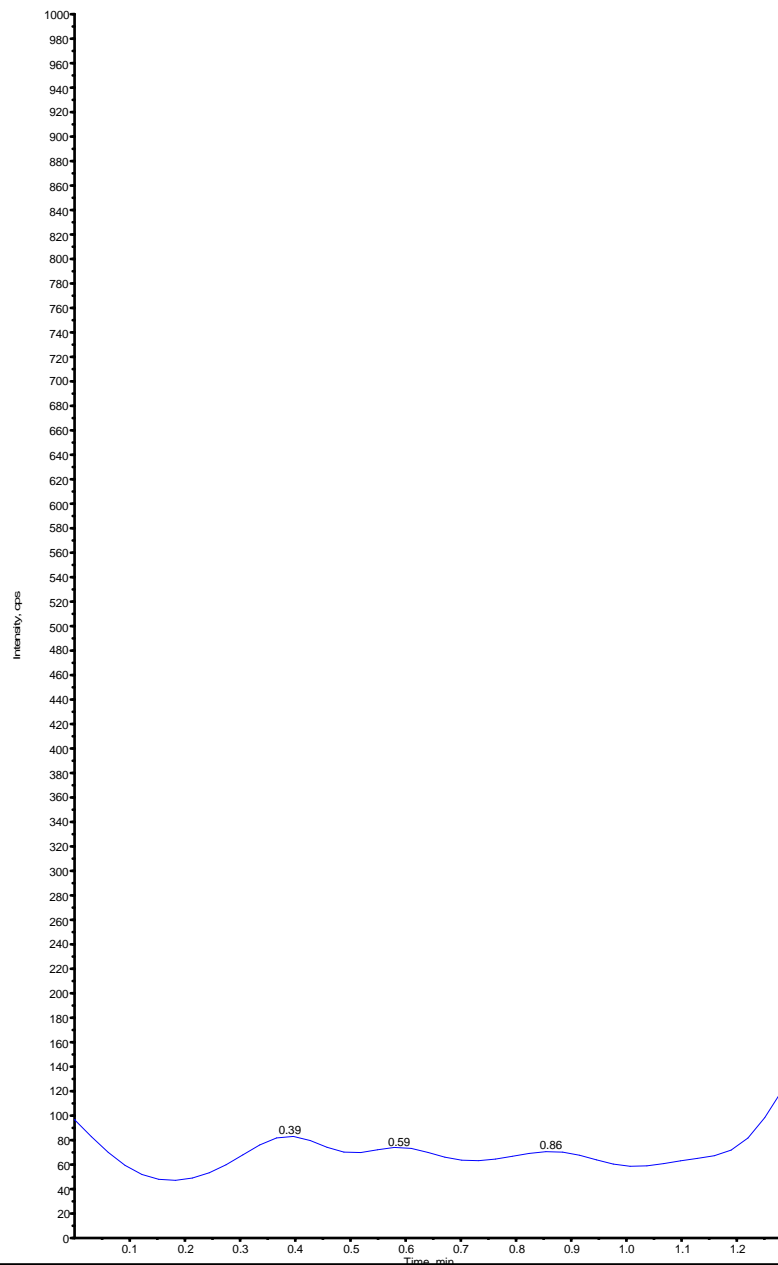

Sample Name: "Blank all sol 50/50 mech/h2o" Sample ID: "" File: "Validation 1.wiff"  
Peak Name: "Torsemide(S)" Mass(es): "348.988/263.900 Da"  
Comment: "" Annotation: ""  
Sample Index: 2  
Sample Type: Blank  
Concentration: 1.00 ng/mL  
Calculated Conc: N/A  
Acq. Date: 8/9/2015  
Acq. Time: 5:55:18 PM  
Modified: No

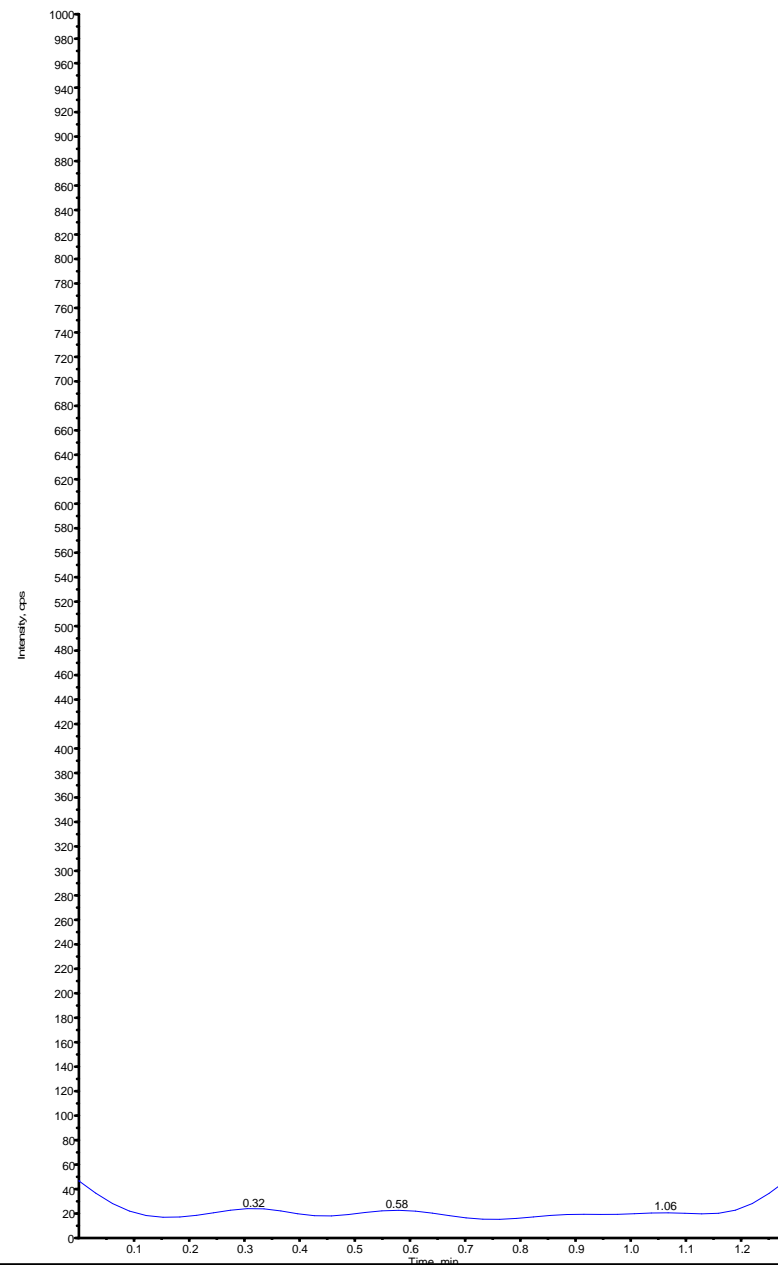

Sample Name: "Blank all sol 50/50 mech/h2o" Sample ID: "" File: "Validation 1.wiff"  
Peak Name: "Benfotamine" Mass(es): "467.185/122.100 Da"  
Comment: "" Annotation: ""  
Sample Index: 2  
Sample Type: Blank  
Concentration: 0.00 ng/mL  
Calculated Conc: N/A  
Acq. Date: 8/9/2015  
Acq. Time: 5:55:18 PM  
Modified: No

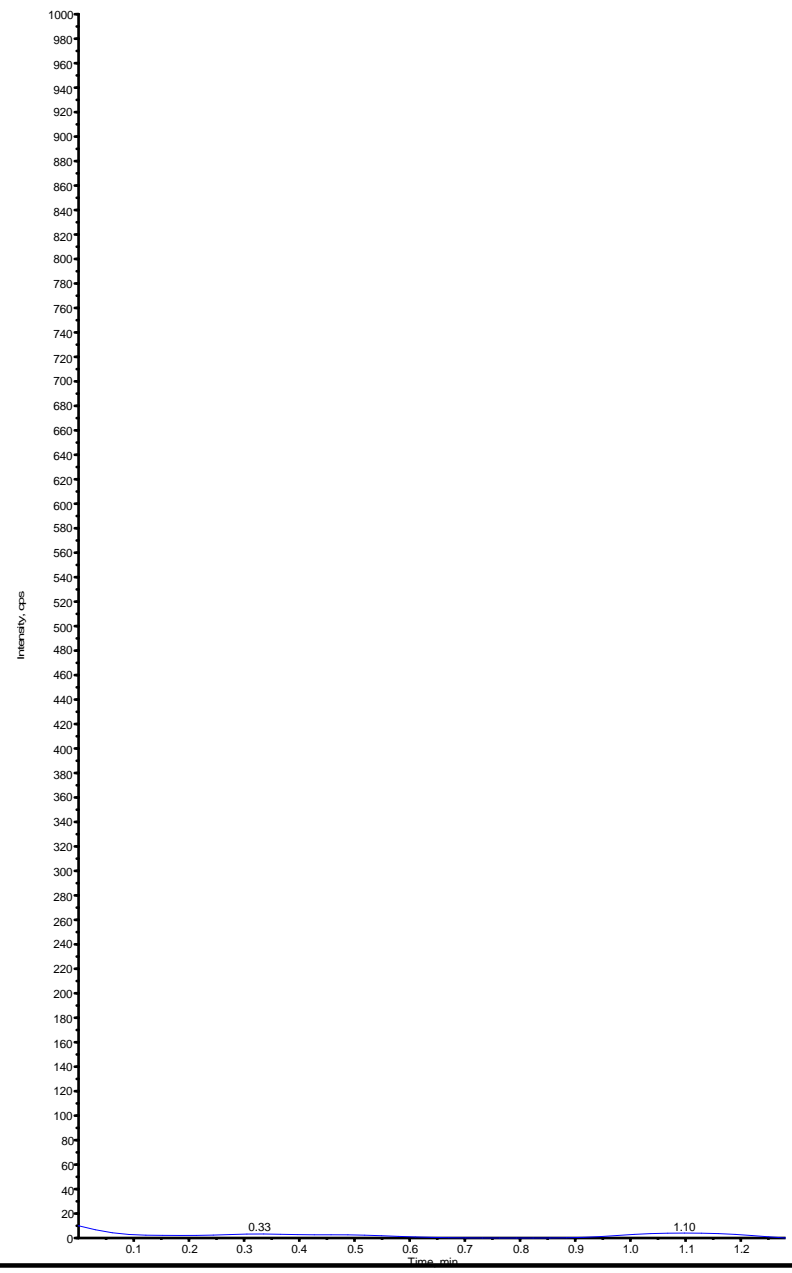

Sample Name: "Blank all sol 50/50 mech/h2o" Sample ID: "" File: "Validation 1.wiff"  
Peak Name: "Torsemide(S)" Mass(es): "348.988/263.900 Da"  
Comment: "" Annotation: ""  
Sample Index: 2  
Sample Type: Blank  
Concentration: 1.00 ng/mL  
Calculated Conc: N/A  
Acq. Date: 8/9/2015  
Acq. Time: 5:55:18 PM  
Modified: No

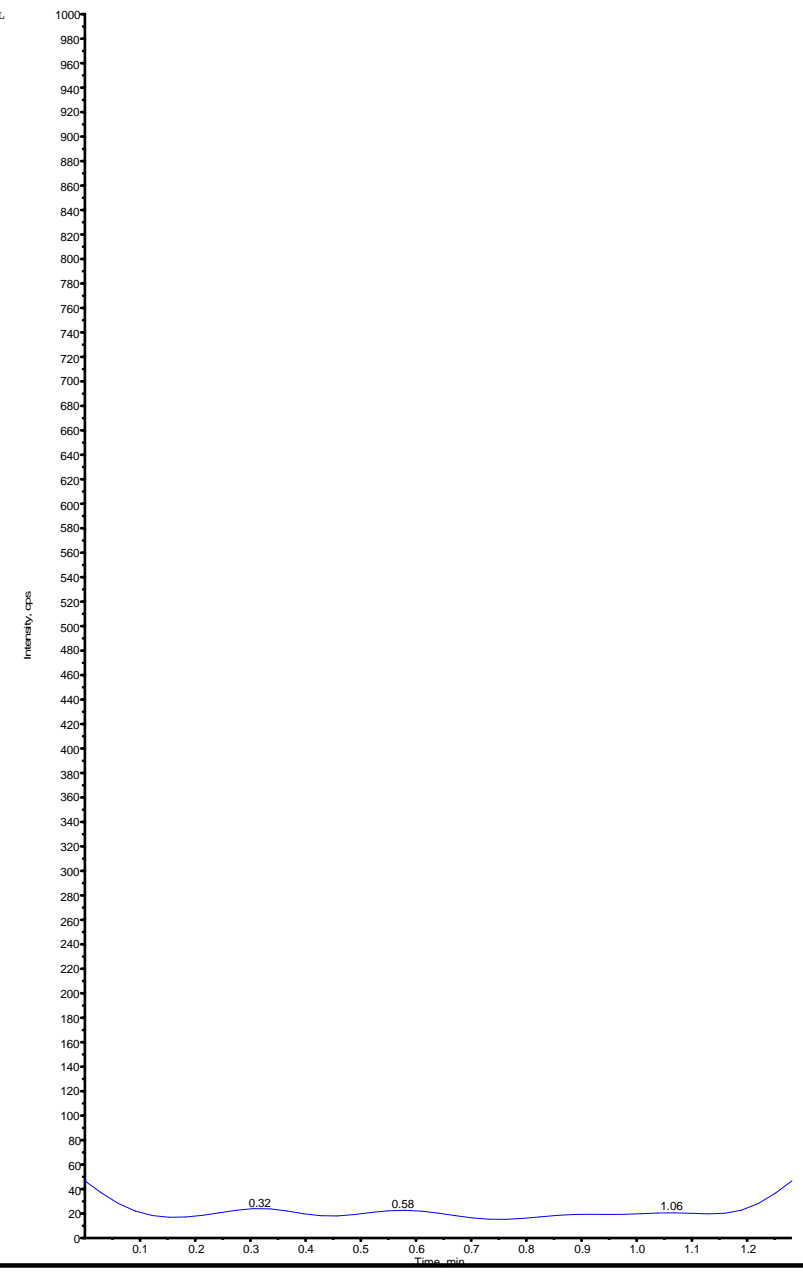

Sample Name: "Blank all sol 50/50 mech/h2o" Sample ID: "" File: "Validation 1.wiff"  
Peak Name: "Pyridoxime" Mass(es): "170.099/152.200 Da"  
Comment: "" Annotation: ""  
Sample Index: 2  
Sample Type: Blank  
Concentration: 0.00 ng/mL  
Calculated Conc: N/A  
Acq. Date: 8/9/2015  
Acq. Time: 5:55:18 PM  
Modified: No

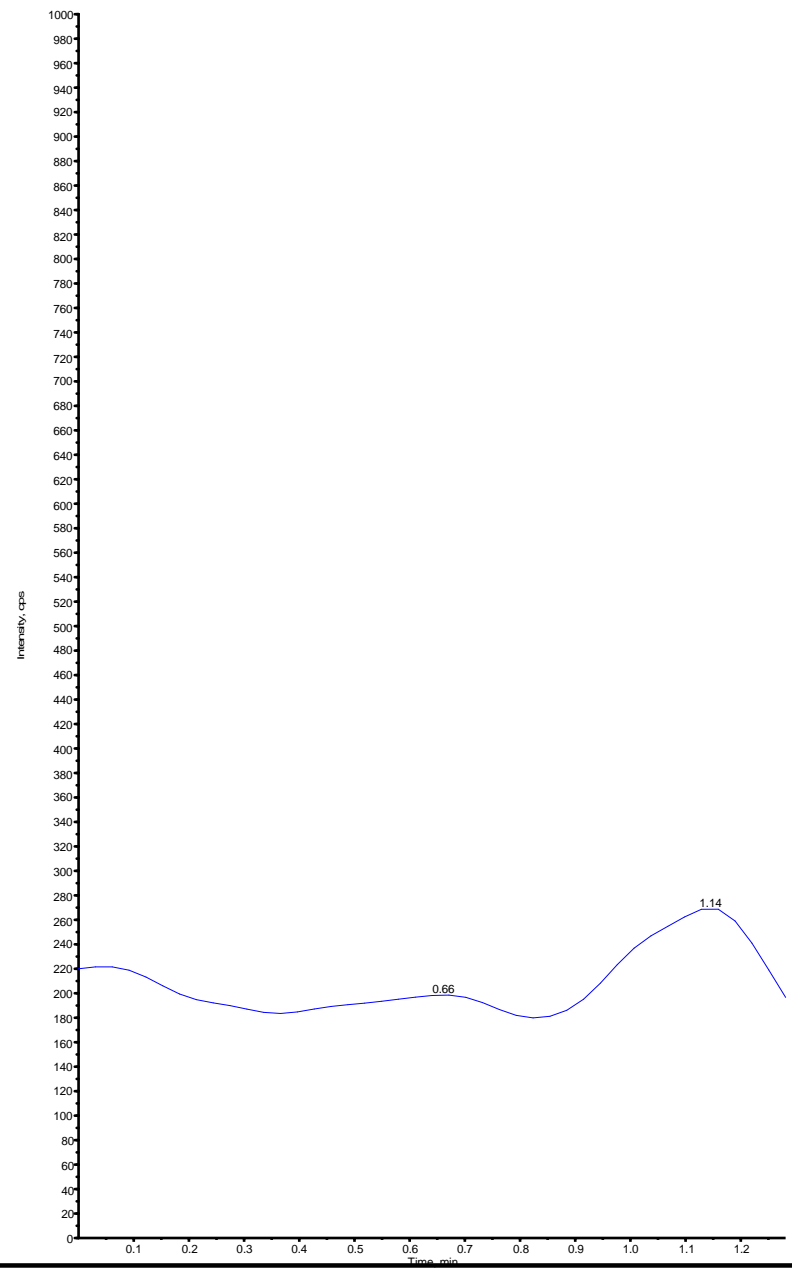

Sample Name: "Blank all sol 50/50 mech/h2o" Sample ID: "" File: "Validation 1.wiff"  
Peak Name: "Torsemide(S)" Mass(es): "348.988/263.900 Da"  
Comment: "" Annotation: ""  
Sample Index: 2  
Sample Type: Blank  
Concentration: 1.00 ng/mL  
Calculated Conc: N/A  
Acq. Date: 8/9/2015  
Acq. Time: 5:55:18 PM  
Modified: No

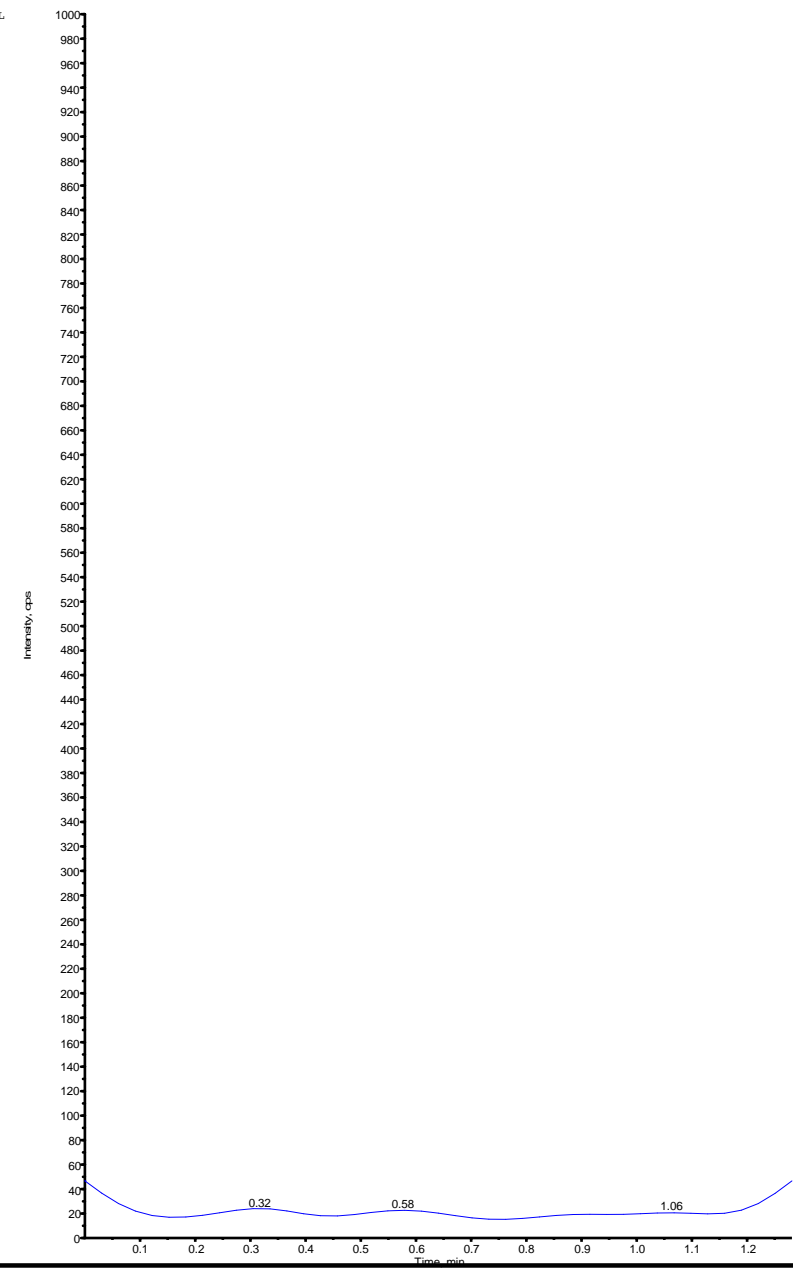

Sample Name: "Blank all sol 50/50 mech/h2o" Sample ID: "" File: "Validation 1.wiff"  
Peak Name: "Cyanocobalamin" Mass(es): "678.637/147.100 Da"  
Comment: "" Annotation: ""  
Sample Index: 2  
Sample Type: Blank  
Concentration: 0.00 ng/mL  
Calculated Conc: N/A  
Acq. Date: 8/9/2015  
Acq. Time: 5:55:18 PM  
Modified: No

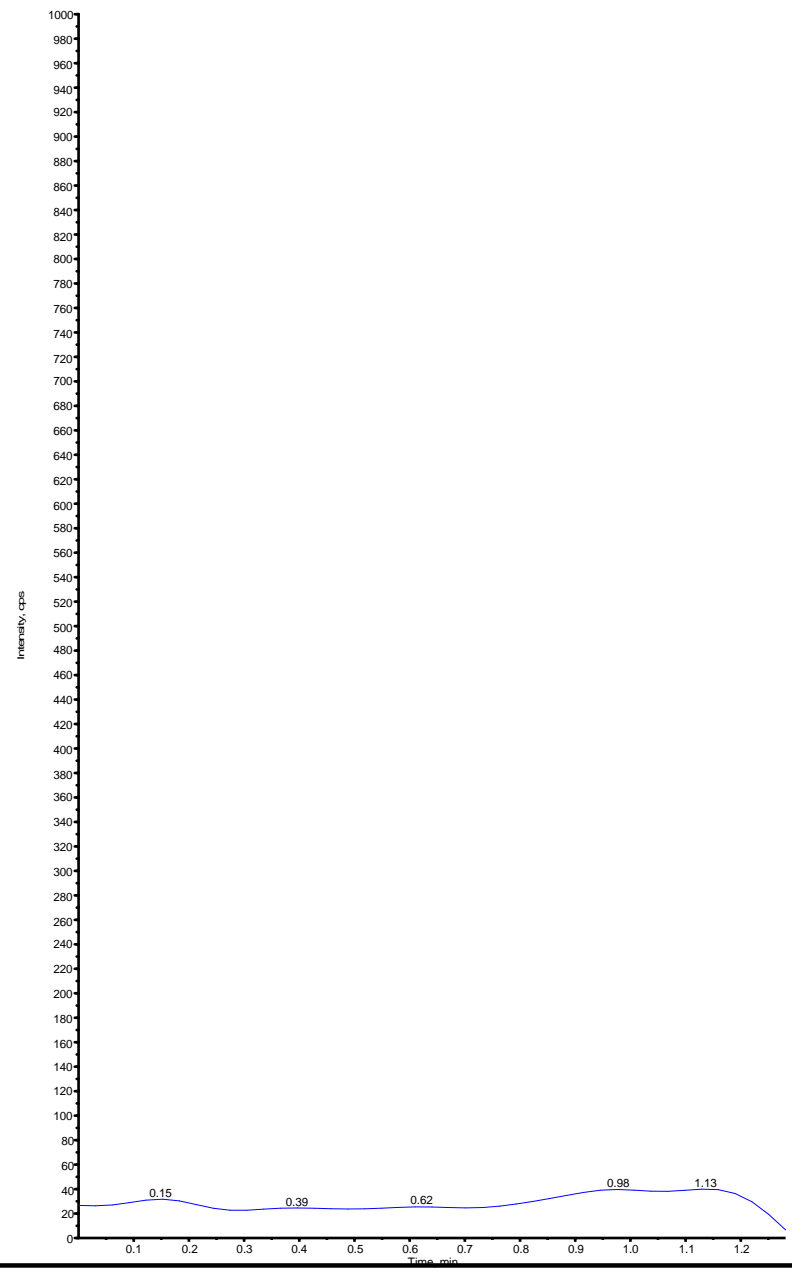

Sample Name: "Blank all sol 50/50 mech/h2o" Sample ID: "" File: "Validation 1.wiff"  
Peak Name: "Torsemide(S)" Mass(es): "348.988/263.900 Da"  
Comment: "" Annotation: ""  
Sample Index: 2  
Sample Type: Blank  
Concentration: 1.00 ng/mL  
Calculated Conc: N/A  
Acq. Date: 8/9/2015  
Acq. Time: 5:55:18 PM  
Modified: No



Sample Name: "Blank all sol 50/50 mech/h2o" Sample ID: "" File: "Validation 1.wiff"  
Peak Name: "diclofenac" Mass(es): "296.018/214.200 Da"  
Comment: "" Annotation: ""  
Sample Index: 2  
Sample Type: Blank  
Concentration: 0.00 ng/mL  
Calculated Conc: N/A  
Acq. Date: 8/9/2015  
Acq. Time: 5:55:18 PM  
Modified: No

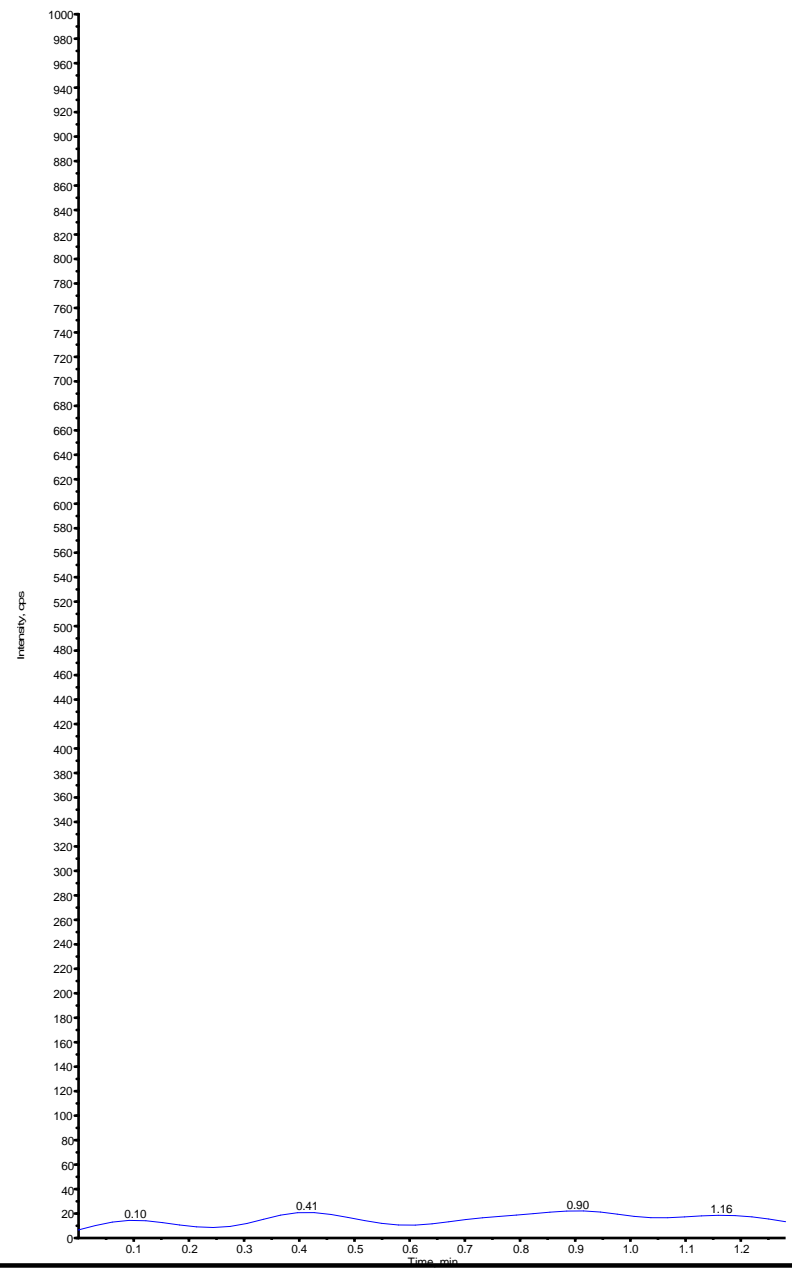

Sample Name: "Blank all sol 50/50 mech/h2o" Sample ID: "" File: "Validation 1.wiff"  
Peak Name: "Torsemide(S)" Mass(es): "348.988/263.900 Da"  
Comment: "" Annotation: ""  
Sample Index: 2  
Sample Type: Blank  
Concentration: 1.00 ng/mL  
Calculated Conc: N/A  
Acq. Date: 8/9/2015  
Acq. Time: 5:55:18 PM  
Modified: No



Supplement: c6ra03867k1.pdf [file c6ra03867k1.pdf]
